# Supplementary material for: Study on slurry mass concentration prediction method driven by multi-source data fusion
Source: PeerJ journal article supplement (doi:10.7717/peerj-cs.3512), 2026-01-19
Supplement: code.zip [file data1.xlsx]

## Sheet: Sheet1
X1	X2	X3	X4	Y5	Y6	G
0.179022	0	0	0.102417	0.675764	1.4798	10
0.567166	0	0	0.122736	0.810916	1.4798	12
0.929264	0	0	0.143	0.946069	1.4798	14
1.31622	0	0.000163878	0.16321	1.08122	1.4798	16
1.70697	0.000352598	0.000405417	0.183366	1.21637	1.4798	18
2.03898	0.0219235	0.0239231	0.203469	1.35153	1.4798	20
2.40468	0.252939	0.239626	0.223518	1.48668	1.4798	22
2.74473	0.616132	0.572253	0.243513	1.62183	1.4798	24
3.15021	1.03263	0.952926	0.263455	1.75699	1.4798	26
3.45033	1.35244	1.252	0.283345	1.89214	1.4798	28
3.85776	1.78467	1.6521	0.303182	2.02729	1.4798	30
4.2135	2.14748	1.99277	0.322966	2.16244	1.4798	32
4.58148	2.53233	2.3393	0.342698	2.2976	1.4798	34
4.96021	2.92212	2.70092	0.362378	2.43275	1.4798	36
5.25718	3.22932	3.0037	0.382006	2.5679	1.4798	38
5.58038	3.57183	3.32891	0.401582	2.70305	1.4798	40
5.89903	3.87846	3.61699	0.421107	2.83821	1.4798	42
6.26659	4.26785	3.98006	0.440581	2.97336	1.4798	44
6.47149	4.4864	4.17818	0.460004	3.10851	1.4798	46
6.96798	4.9937	4.68335	0.479375	3.24367	1.4798	48
7.26345	5.31325	4.96151	0.498697	3.37882	1.4798	50
0.00189761	0	0	0.0689557	0.382325	1.5693	6
0.385973	0	0	0.0918243	0.509766	1.5693	8
0.875138	0	0	0.114635	0.637208	1.5693	10
1.40412	0	0	0.137388	0.76465	1.5693	12
1.91325	0.00457628	0.00175673	0.160084	0.892091	1.5693	14
2.41595	0.350169	0.243277	0.182722	1.01953	1.5693	16
2.91847	0.869006	0.733895	0.205303	1.14697	1.5693	18
3.41264	1.40168	1.19903	0.227827	1.27442	1.5693	20
3.87746	1.87832	1.66445	0.250295	1.40186	1.5693	22
4.38456	2.40605	2.13957	0.272707	1.5293	1.5693	24
4.86377	2.89395	2.60628	0.295062	1.65674	1.5693	26
5.35067	3.38846	3.07789	0.317361	1.78418	1.5693	28
5.83033	3.88539	3.54483	0.339604	1.91162	1.5693	30
6.25446	4.29947	3.94074	0.361792	2.03907	1.5693	32
6.80295	4.8701	4.47131	0.383925	2.16651	1.5693	34
7.22942	5.3101	4.90236	0.406002	2.29395	1.5693	36
7.64038	5.72497	5.30101	0.428024	2.42139	1.5693	38
8.03829	6.16968	5.74755	0.449992	2.54883	1.5693	40
8.39996	6.58137	6.16166	0.471905	2.67627	1.5693	42
8.81357	7.07632	6.62984	0.493764	2.80372	1.5693	44
9.09362	7.46019	7.02793	0.515569	2.93116	1.5693	46
9.34294	7.84789	7.42803	0.53732	3.0586	1.5693	48
9.54701	8.21178	7.79714	0.559017	3.18604	1.5693	50
0.279559	0	0	0.0763042	0.359192	1.6704	6
0.879947	0	0	0.101618	0.478922	1.6704	8
1.48834	0	5.23167e-07	0.126871	0.598653	1.6704	10
2.06538	0.0368234	0.00767726	0.152064	0.718383	1.6704	12
2.6866	0.649608	0.490506	0.177197	0.838114	1.6704	14
3.29333	1.28665	1.06565	0.202271	0.957844	1.6704	16
3.86544	1.8662	1.61653	0.227286	1.07757	1.6704	18
4.41427	2.42355	2.13366	0.252241	1.19731	1.6704	20
4.97062	2.98202	2.65828	0.277137	1.31704	1.6704	22
5.53709	3.54493	3.20845	0.301974	1.43677	1.6704	24
6.05146	4.05674	3.69215	0.326753	1.5565	1.6704	26
6.64164	4.63819	4.25793	0.351474	1.67623	1.6704	28
7.13884	5.12918	4.74029	0.376136	1.79596	1.6704	30
7.65231	5.66174	5.25956	0.40074	1.91569	1.6704	32
8.114	6.16059	5.75233	0.425287	2.03542	1.6704	34
8.56403	6.66574	6.24602	0.449776	2.15515	1.6704	36
8.94819	7.15902	6.72758	0.474208	2.27488	1.6704	38
9.24893	7.62068	7.19204	0.498583	2.39461	1.6704	40
9.51402	8.04553	7.63546	0.5229	2.51434	1.6704	42
9.67079	8.43915	8.05236	0.547161	2.63407	1.6704	44
9.78639	8.7861	8.42105	0.571366	2.7538	1.6704	46
9.8622	9.07177	8.74765	0.595514	2.87353	1.6704	48
9.92359	9.30535	9.01669	0.619606	2.99326	1.6704	50
0.000527137	0	0	0.0558321	0.224039	1.7854	4
0.58648	0	0	0.0836547	0.336058	1.7854	6
1.26867	0	0	0.111415	0.448078	1.7854	8
1.91839	0.00229013	0.000140699	0.139114	0.560097	1.7854	10
2.57554	0.548378	0.381799	0.166751	0.672116	1.7854	12
3.2261	1.22242	1.00248	0.194326	0.784136	1.7854	14
3.86216	1.86139	1.583	0.221841	0.896155	1.7854	16
4.47721	2.47461	2.1679	0.249294	1.00817	1.7854	18
5.06239	3.04612	2.71982	0.276687	1.12019	1.7854	20
5.66057	3.62986	3.275	0.304019	1.23221	1.7854	22
6.24252	4.19734	3.83483	0.33129	1.34423	1.7854	24
6.79472	4.73685	4.35716	0.358501	1.45625	1.7854	26
7.32439	5.269	4.87067	0.385652	1.56827	1.7854	28
7.83848	5.78808	5.37417	0.412744	1.68029	1.7854	30
8.32678	6.31878	5.89809	0.439776	1.79231	1.7854	32
8.75777	6.82791	6.40894	0.466748	1.90433	1.7854	34
9.11908	7.31572	6.89742	0.493661	2.01635	1.7854	36
9.39168	7.76734	7.35954	0.520515	2.12837	1.7854	38
9.62885	8.22795	7.83958	0.54731	2.24039	1.7854	40
9.76009	8.59845	8.25523	0.574047	2.35241	1.7854	42
9.82657	8.91706	8.60379	0.600725	2.46443	1.7854	44
9.88777	9.17173	8.91012	0.627345	2.57645	1.7854	46
9.96343	9.38588	9.16989	0.653907	2.68847	1.7854	48
9.94163	9.48338	9.31248	0.68041	2.80048	1.7854	50
0.128077	0	0	0.0607354	0.208617	1.9174	4
0.911588	0	0	0.0910083	0.312925	1.9174	6
1.67303	1.12218e-05	0	0.121218	0.417233	1.9174	8
2.37592	0.371193	0.167687	0.151366	0.521541	1.9174	10
3.08539	1.09672	0.834628	0.181451	0.62585	1.9174	12
3.75506	1.76311	1.45583	0.211473	0.730158	1.9174	14
4.397	2.39599	2.05927	0.241434	0.834466	1.9174	16
5.00352	2.97737	2.61442	0.271332	0.938775	1.9174	18
5.62001	3.57032	3.20179	0.301169	1.04308	1.9174	20
6.20911	4.13428	3.74233	0.330944	1.14739	1.9174	22
6.8033	4.70283	4.30168	0.360658	1.2517	1.9174	24
7.37099	5.26778	4.85352	0.390311	1.35601	1.9174	26
7.91362	5.81764	5.40163	0.419903	1.46032	1.9174	28
8.40319	6.36502	5.94307	0.449434	1.56462	1.9174	30
8.83025	6.89822	6.46013	0.478904	1.66893	1.9174	32
9.21619	7.44699	7.00794	0.508314	1.77324	1.9174	34
9.47069	7.92714	7.50705	0.537664	1.87755	1.9174	36
9.61761	8.36703	7.97902	0.566954	1.98186	1.9174	38
9.72406	8.75541	8.41166	0.596183	2.08617	1.9174	40
9.78615	9.06863	8.78187	0.625354	2.19047	1.9174	42
9.89896	9.32853	9.10869	0.654464	2.29478	1.9174	44
9.85446	9.46489	9.30588	0.683516	2.39909	1.9174	46
9.90596	9.60186	9.49003	0.712508	2.5034	1.9174	48
9.94251	9.75625	9.52132	0.741441	2.60771	1.9174	50
0.269141	0	0	0.0656379	0.193194	2.0704	4
1.13789	0	0	0.0983619	0.289792	2.0704	6
1.90865	0.00117427	1.26133e-06	0.131023	0.386389	2.0704	8
2.68961	0.69626	0.453849	0.163621	0.482986	2.0704	10
3.41765	1.4268	1.13371	0.196157	0.579583	2.0704	12
4.12759	2.11969	1.79045	0.22863	0.67618	2.0704	14
4.79475	2.75937	2.40454	0.261041	0.772777	2.0704	16
5.44703	3.37157	3.00598	0.29339	0.869375	2.0704	18
6.08394	3.98423	3.59774	0.325677	0.965972	2.0704	20
6.69944	4.5711	4.17017	0.357903	1.06257	2.0704	22
7.28642	5.14749	4.72899	0.390066	1.15917	2.0704	24
7.86405	5.73312	5.31452	0.422169	1.25576	2.0704	26
8.38406	6.3039	5.87436	0.45421	1.35236	2.0704	28
8.8201	6.86677	6.42201	0.48619	1.44896	2.0704	30
9.17835	7.39061	6.96317	0.518109	1.54555	2.0704	32
9.42537	7.8975	7.48371	0.549968	1.64215	2.0704	34
9.60736	8.34576	7.95447	0.581766	1.73875	2.0704	36
9.68759	8.74646	8.38658	0.613504	1.83535	2.0704	38
9.76367	9.05889	8.76583	0.645182	1.93194	2.0704	40
9.80127	9.2597	9.02944	0.676799	2.02854	2.0704	42
9.80458	9.41052	9.2368	0.708357	2.12514	2.0704	44
9.81278	9.49839	9.36049	0.739856	2.22173	2.0704	46
9.81728	9.53474	9.44099	0.771294	2.31833	2.0704	48
9.80655	9.56164	9.48222	0.802674	2.41493	2.0704	50
0.492153	0	0	0.070546	0.177772	2.2501	4
1.38538	0	0	0.105725	0.266658	2.2501	6
2.2052	0.203645	0.0253167	0.140842	0.355544	2.2501	8
2.98286	0.987278	0.731402	0.175897	0.44443	2.2501	10
3.69876	1.6906	1.39257	0.21089	0.533316	2.2501	12
4.37276	2.33335	2.00867	0.24582	0.622202	2.2501	14
5.04801	2.9707	2.62311	0.28069	0.711088	2.2501	16
5.68713	3.5739	3.20167	0.315497	0.799975	2.2501	18
6.32004	4.17051	3.77744	0.350244	0.888861	2.2501	20
6.94191	4.76043	4.36288	0.384929	0.977747	2.2501	22
7.51563	5.32268	4.91257	0.419553	1.06663	2.2501	24
8.07007	5.90574	5.47923	0.454117	1.15552	2.2501	26
8.55265	6.45826	6.02213	0.488619	1.2444	2.2501	28
8.99051	7.03301	6.585	0.523062	1.33329	2.2501	30
9.31475	7.5654	7.11676	0.557443	1.42218	2.2501	32
9.52729	8.0557	7.6187	0.591765	1.51106	2.2501	34
9.67801	8.50936	8.09249	0.626027	1.59995	2.2501	36
9.77546	8.89489	8.50629	0.660228	1.68884	2.2501	38
9.82023	9.18811	8.84178	0.69437	1.77772	2.2501	40
9.81916	9.37542	9.07463	0.728453	1.86661	2.2501	42
9.85776	9.51862	9.24931	0.762475	1.95549	2.2501	44
9.90895	9.63728	9.38928	0.796439	2.04438	2.2501	46
9.87275	9.65286	9.43142	0.830344	2.13327	2.2501	48
9.8805	9.68878	9.47504	0.864189	2.22215	2.2501	50
0.000591553	0	0	0.0820439	0.540611	1.4798	8
